# Supplementary material for: Injectable polyoxazoline grafted hyaluronic acid thermoresponsive hydrogels for biomedical applications
Source: Royal Society of Chemistry journal article supplement (doi:10.1039/d3tb02108d), 2024-01-01
Supplement: d3tb02108d1.pdf [file d3tb02108d1.pdf]

## Supporting information

### Injectable polyoxazoline grafted hyaluronic acid thermoresponsive hydrogel for biomedical applications.

Morgane Morel<sup>a,b</sup>, Mathieu Madau<sup>a</sup>, Virginie Dulong<sup>a</sup>, Anne-Claire Groo<sup>b</sup>, Aurélie Malzert-Fréon<sup>b</sup>, Didier Le Cerf<sup>a</sup>, Luc Picton<sup>a\*</sup>

<sup>a</sup> Univ Rouen Normandie, CNRS, PBS UMR6270, F-76000 Rouen, France

<sup>b</sup> Univ Caen Normandie, CERMN, UR4258, F-14000 Caen, France

#### 1. <sup>1</sup>H NMR characterization of HA-g-P(iPrOx-co-BuOx)

<sup>1</sup>H NMR analysis is used to monitor the evolution and grafting efficiency of the P(iPrOx-co-BuOx) copolymer on hyaluronic acid.

Firstly, an analysis is carried out at the end of the polymerization process (8 scans in CDCl<sub>3</sub> at 5g.L<sup>-1</sup>) of the 2 oxazolines (2-n-isopropyl-2-oxazoline and n-butyl-2-oxazoline) to confirm whether the targeted DP and IPrOx/BuOx ratio have been achieved.

To produce the thermo-sensitive hydrogel, a polymerization degree of 30 and an iPrOx/BuOx ratio of 68/32 are targeted. The results of the <sup>1</sup>H NMR polymerization are shown in Figure S1.

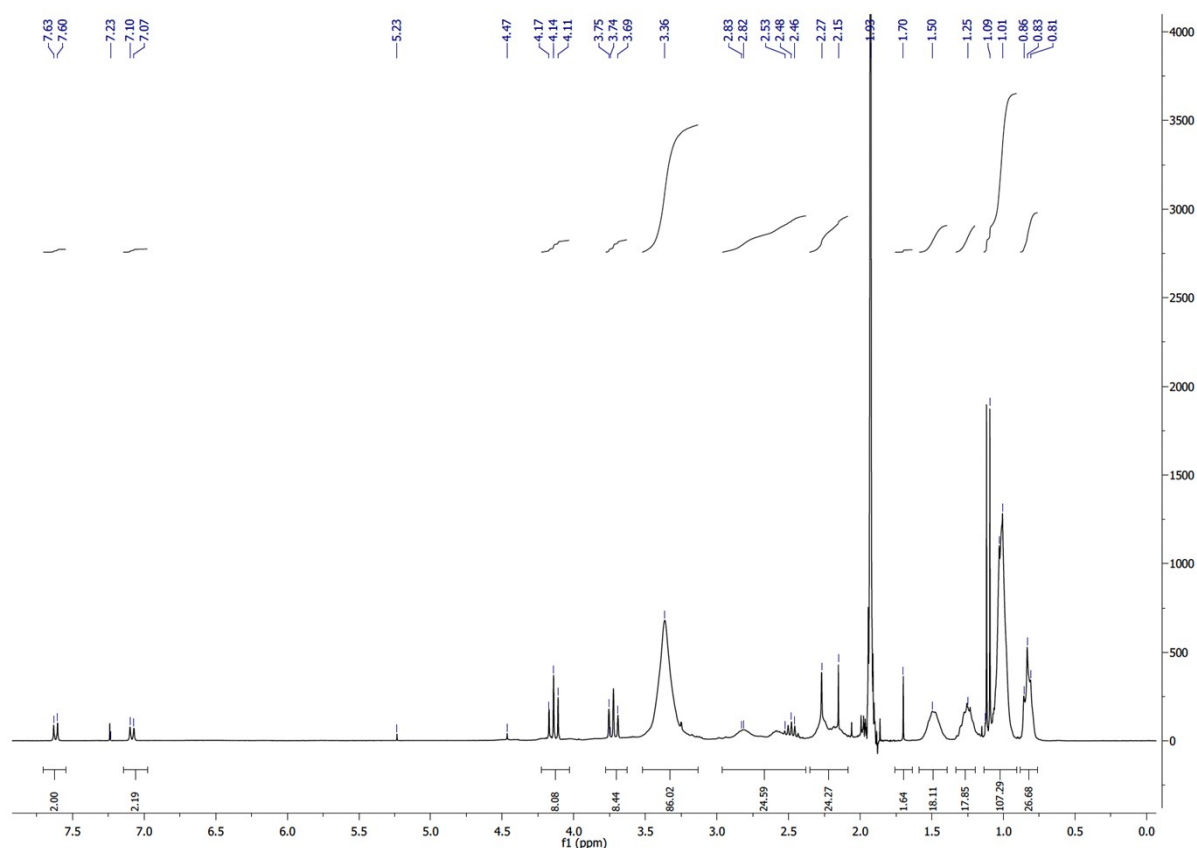

Figure S1 : <sup>1</sup>H NMR spectrum of P(iPrOx-co-BuOx-67-33); DP= 21 in CDCl<sub>3</sub> 8 scans

Equations 1a, 1b, and 2 are used to calculate the IPrOx/BuOx ratio and DP.

$$\% \text{IPrOx} = \frac{\frac{I_{1.1\text{ppm}}}{6}}{\frac{I_{1.1\text{ppm}}}{6} + \frac{I_{0.83\text{ppm}}}{3}} \times 100 \quad (\text{Eq S1a})$$

$$\% \text{BuOx} = \frac{\frac{I_{0.83\text{ppm}}}{3}}{\frac{I_{1.1\text{ppm}}}{6} + \frac{I_{0.83\text{ppm}}}{3}} \times 100 \quad (\text{Eq S1b})$$

Where  $I_{1.1}$  ppm is the pic integration of the 2 methyl groups from the isopropyl oxazolines after the polymerization and  $I_{0.83}$  is the pic integration from the methyl group of the butyl oxazolines.

$$DP = \frac{I_{3.36\text{ppm}}}{4} \times \frac{2}{I_{7.60\text{ppm}}} \quad (\text{Eq S2})$$

Where  $I_{3.36}$  ppm is the pic integration of 2 methylene groups from the oxazoline backbone and where  $I_{7.60}$  is the integration value of the 2 aromatic protons of the tosylate (initiator).

In a second step, a second  $^1\text{H}$  NMR (64 scans in  $\text{D}_2\text{O}/\text{NaOD}$ -0.5% at  $5\text{g}\cdot\text{L}^{-1}$ ) is performed on the final sample of HA-g-P(iPrOx-co-BuOx) after purification, in order to calculate the degree of substitution.

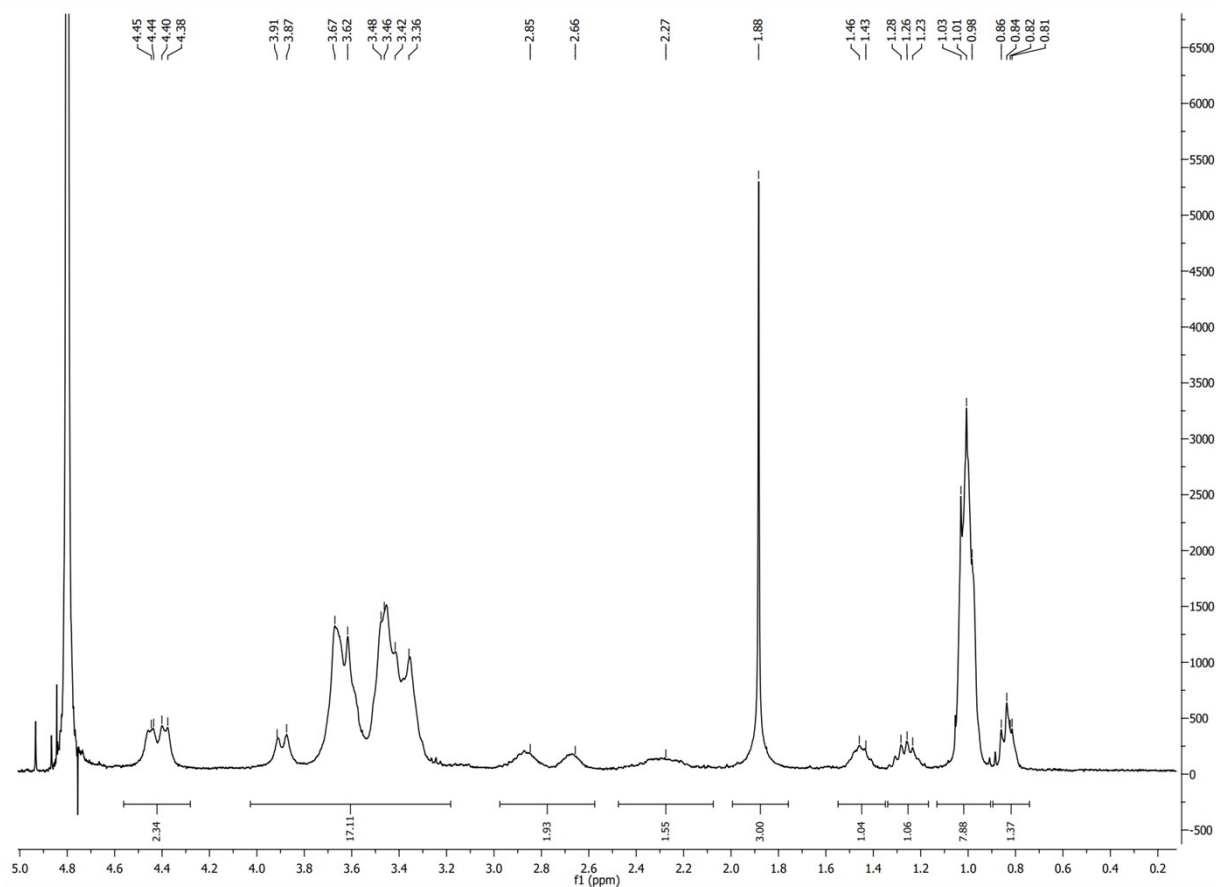

Figure S2 :  $^1\text{H}$  NMR spectrum of HA-g-P(iPrOx-co-BuOx)-67/33-0,08 at  $5\text{g}\cdot\text{L}^{-1}$  in  $\text{D}_2\text{O}$  (with  $0.125\text{M}$  NaOD)

## 2. Hydrogel injectability (at 20°C)

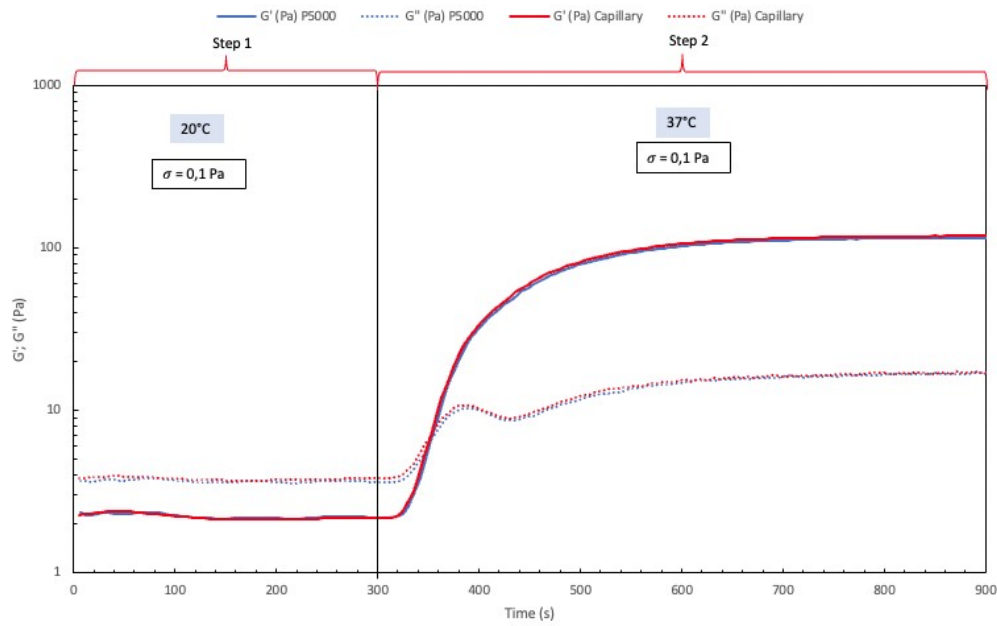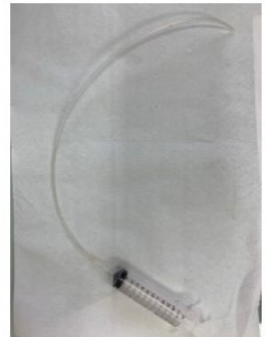

Syringe used: 10mL  
Capillary used: 30cm (length) et 1mm of diameter

Figure S3: Rheological in situ injection via syringe and capillary for HA-g-P(iPrOx-co-BuOx-66/34)-0.10 at 20°C to mimic the injection phenomenon (15g/L in NaCl 0.9%)

## 3. Incorporation of a secondary network (semi-interpenetrating network (IPN) (stability and injectability studies)

As with the hydrogel alone, hydrogel stability measurements were carried out. The results are shown in Figure S4.

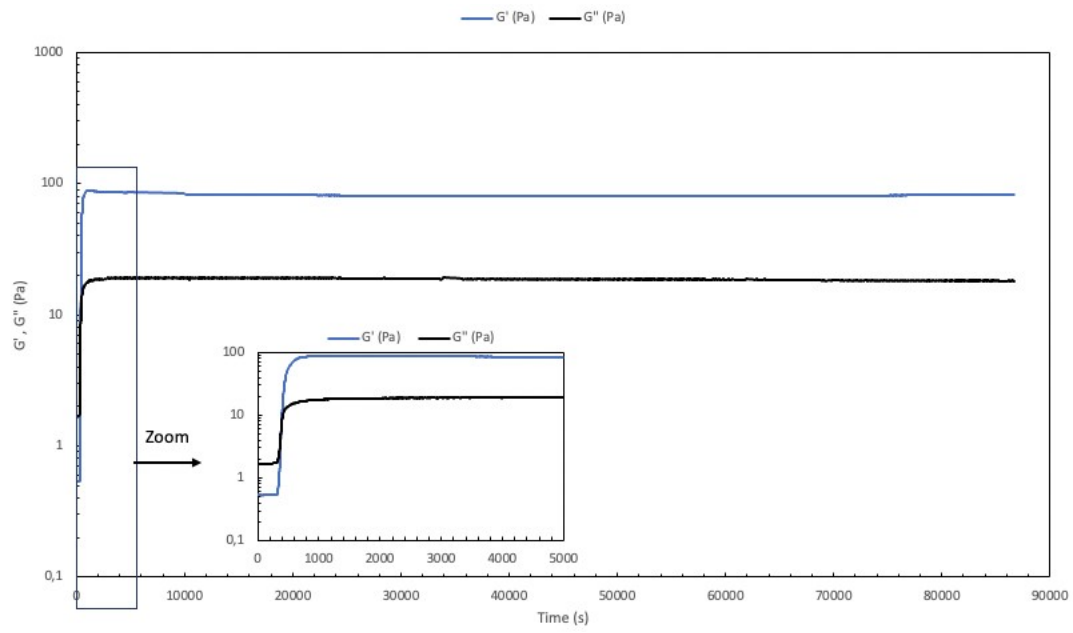

Figure S4: Stability studies of HA-g-P(iPrOx-co-BuOx-66/34)-0.10/native HA mixture (75/25 v/v) at 37°C (15g/L in NaCl 0.9%) for 24h (0.1Pa and 1Hz)

The results obtained are similar to those obtained for hydrogel alone. In fact, the mixture showed module stability at 37°C, over the 24-hour analysis period. So, the incorporation of a secondary network does not affect the stability of the hydrogel alone.

The hydrogel/HA mixture was also subjected to rheological injection simulation (as shown for the hydrogel alone). The same experiment (shown in Figures 5 and 6 of the article) was carried out; the results are below.

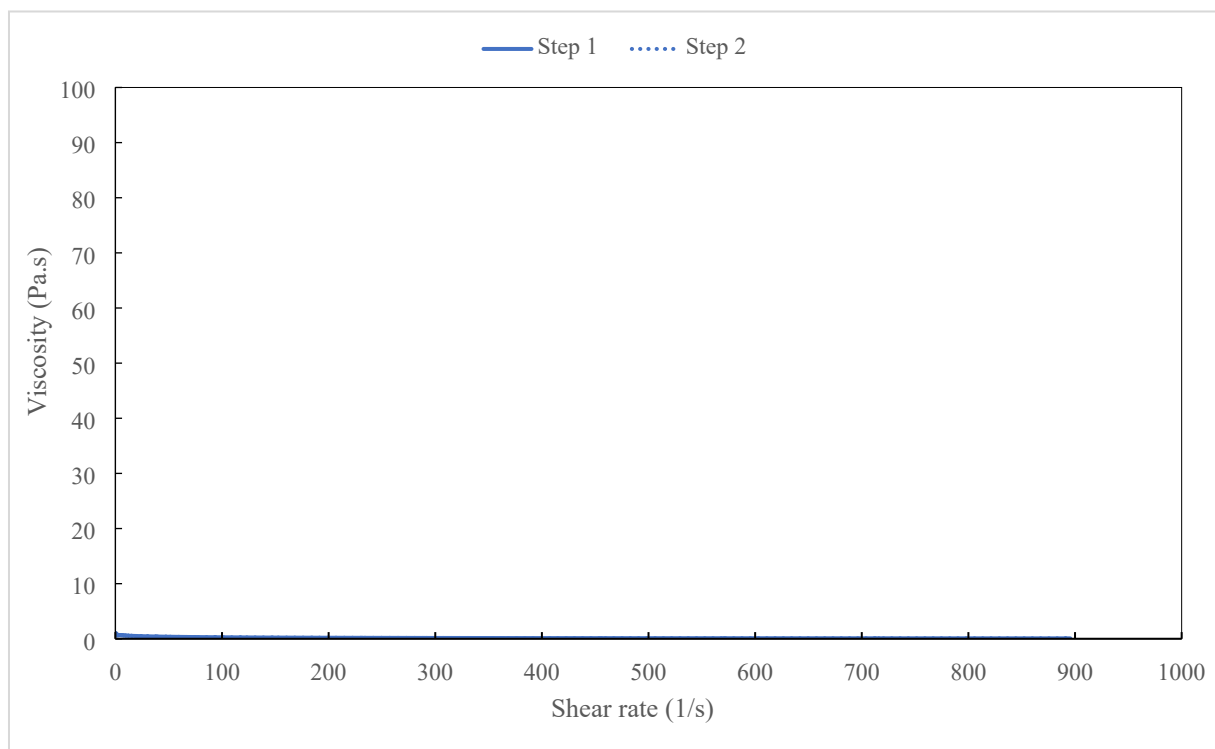

Figure S5: Flow curves for hydrogel/HA 75/25 mixture 15g.L-1 in NaCl 0.9% at 20°C

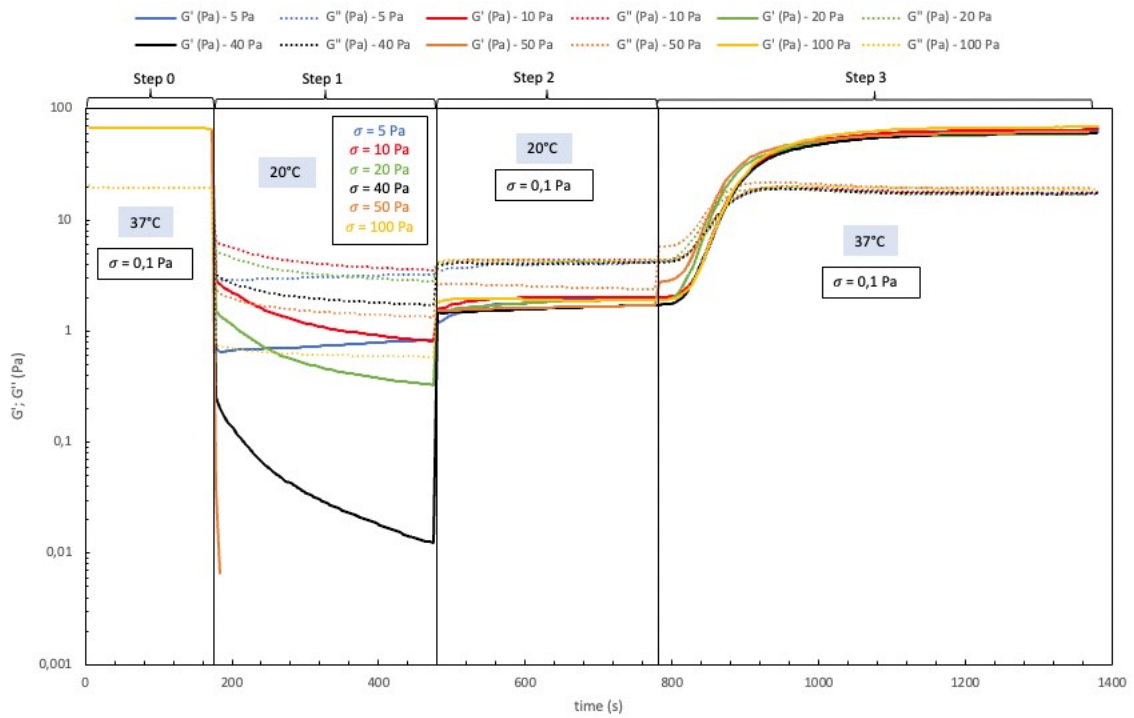

Figure S6: Injection simulation at different stresses of a hydrogel/HA mixture (75/25) 15g/L in NaCl 0.9%

The results obtained for the injectability of the mixture are very similar to those obtained for the hydrogel alone. Indeed, at 20°C, the mixture flows at high shear rates, as shown for the hydrogel alone. In addition, the injection simulation clearly shows that when stress is applied at 20°C, the hydrogel/HA mixture will flow, and when the stress is stopped, the mixture regains its initial properties.
